# Supplementary material for: Enhanced-performance of self-powered flexible quantum dot photodetectors by a double hole transport layer structure
Source: Royal Society of Chemistry journal article supplement (doi:10.1039/c9nr01096c), 2019-01-01
Supplement: c9nr01096c1.pdf [file c9nr01096c1.pdf]

## Supporting Information

# Enhanced-performance of self-powered flexible quantum dot photodetectors by double hole transport layer structure

Ting Shen<sup>a</sup>, David Binks<sup>b</sup>, Jifeng Yuan<sup>a</sup>, Guozhong Cao<sup>a,c</sup>, Jianjun Tian<sup>a\*</sup>

<sup>a</sup>*Institute for Advanced Materials and Technology, University of Science and Technology Beijing, Beijing, 100083, China.*

<sup>b</sup>*School of Physics and Astronomy and Photon Science Institute, University of Manchester, Manchester, M13 9PL, UK*

<sup>c</sup>*Department of Materials and Engineering, University of Washington, Seattle, WA, 98195-2120, USA.*

\*E-mail: tianjianjun@mater.ustb.edu.cn

| Elt. | Line | Intensity (c/s) | Conc    | Units | Error 2-sig | MDL 3-sig |       |
|------|------|-----------------|---------|-------|-------------|-----------|-------|
| C    | Ka   | 297.63          | 46.499  | wt.%  | 4.655       | 0.000     |       |
| Al   | Ka   | 165.59          | 6.672   | wt.%  | 1.134       | 0.000     |       |
| Ge   | La   | 27.55           | 2.456   | wt.%  | 0.932       | 0.000     |       |
| Se   | La   | 196.77          | 14.348  | wt.%  | 1.699       | 0.000     |       |
| Cd   | La   | 425.89          | 21.418  | wt.%  | 1.441       | 0.000     |       |
| Te   | La   | 118.42          | 8.608   | wt.%  | 1.288       | 0.000     |       |
|      |      |                 | 100.000 | wt.%  |             |           | Total |

| Elt. | Line | Intensity (c/s) | Conc    | Units | Error 2-sig | MDL 3-sig |       |
|------|------|-----------------|---------|-------|-------------|-----------|-------|
| C    | Ka   | 294.40          | 45.692  | wt.%  | 4.581       | 0.000     |       |
| Ge   | La   | 26.10           | 2.612   | wt.%  | 1.052       | 0.000     |       |
| Se   | La   | 232.02          | 18.972  | wt.%  | 1.870       | 0.000     |       |
| Cd   | La   | 424.93          | 23.270  | wt.%  | 1.567       | 0.000     |       |
| Te   | La   | 118.69          | 9.454   | wt.%  | 1.411       | 0.000     |       |
|      |      |                 | 100.000 | wt.%  |             |           | Total |

| Elt. | Line | Intensity (c/s) | Conc    | Units | Error 2-sig | MDL 3-sig |       |
|------|------|-----------------|---------|-------|-------------|-----------|-------|
| C    | Ka   | 294.59          | 45.938  | wt.%  | 4.604       | 0.000     |       |
| Se   | La   | 238.22          | 19.836  | wt.%  | 1.891       | 0.000     |       |
| Cd   | La   | 425.07          | 24.300  | wt.%  | 1.636       | 0.000     |       |
| Te   | La   | 118.57          | 9.926   | wt.%  | 1.484       | 0.000     |       |
|      |      |                 | 100.000 | wt.%  |             |           | Total |

| Elt. | Line | Intensity (c/s) | Conc    | Units | Error 2-sig | MDL 3-sig |       |
|------|------|-----------------|---------|-------|-------------|-----------|-------|
| C    | Ka   | 403.16          | 47.340  | wt.%  | 4.649       | 0.000     |       |
| Se   | La   | 320.59          | 19.859  | wt.%  | 1.700       | 0.000     |       |
| Cd   | La   | 537.17          | 23.047  | wt.%  | 1.453       | 0.000     |       |
| Te   | La   | 156.05          | 9.755   | wt.%  | 1.420       | 0.000     |       |
|      |      |                 | 100.000 | wt.%  |             |           | Total |

**Figure S1.** Amount of elements in the CdSe<sub>x</sub>Te<sub>1-x</sub> alloyed quantum dots determined from EDS.

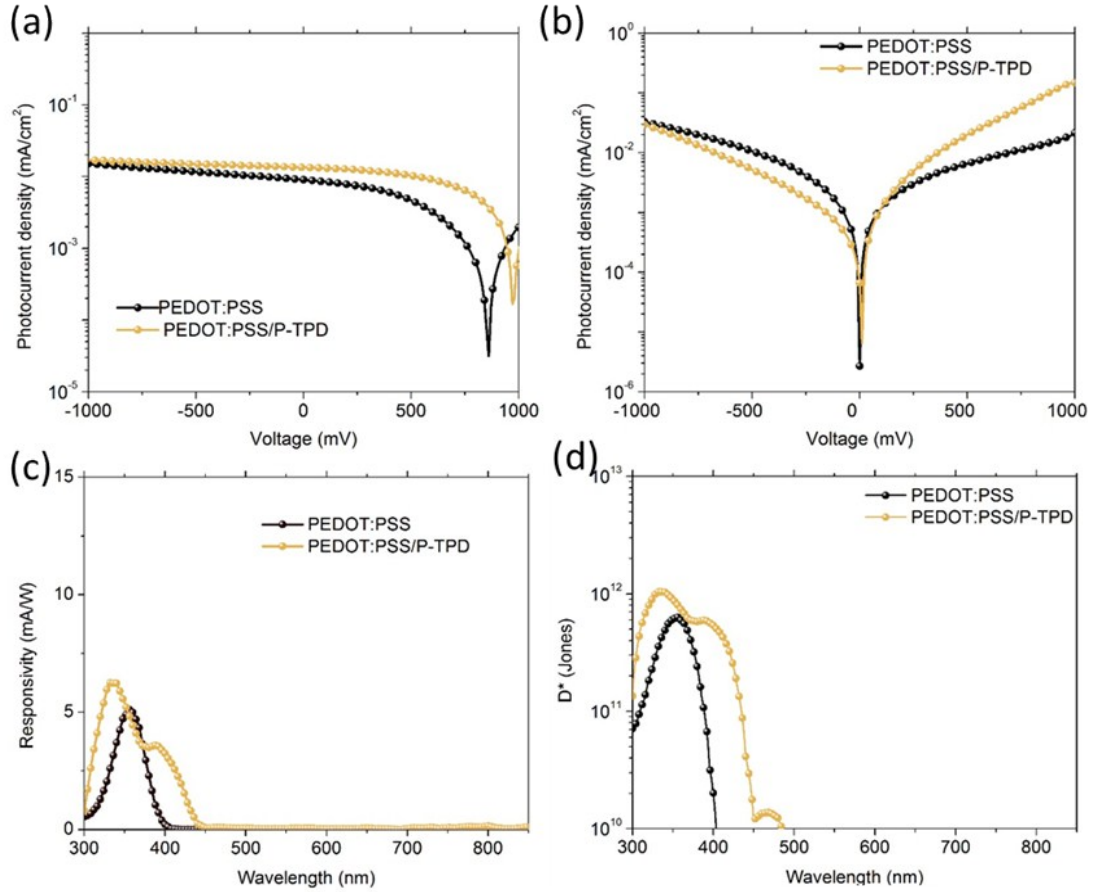

**Figure S2.** Current-voltage characteristic under light (a) and dark, (b) Responsivity and (c) normalized detectivity (d) of the two kinds of devices without QDs upon 100 mW/cm<sup>2</sup> sun light intensity.

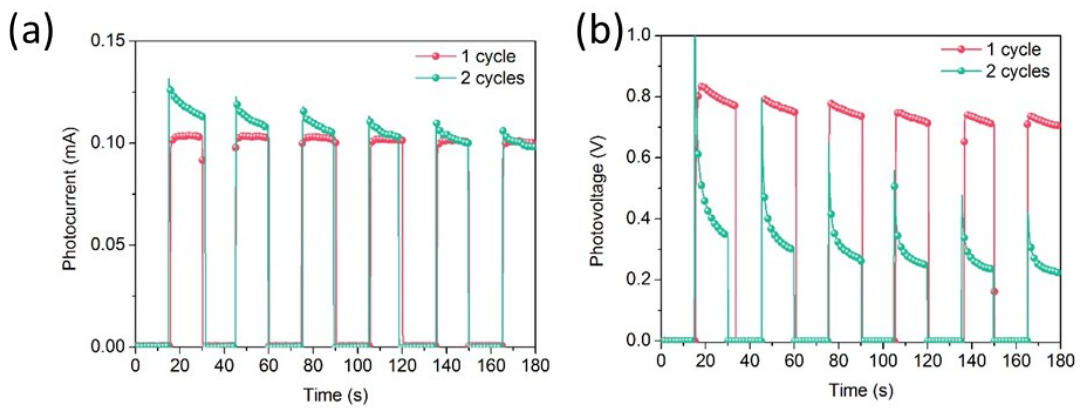

**Figure S3.** The temporal response and recovery of (a) current density and photovoltage of the devices based on different thickness of P-TPD layer and QDs layer.

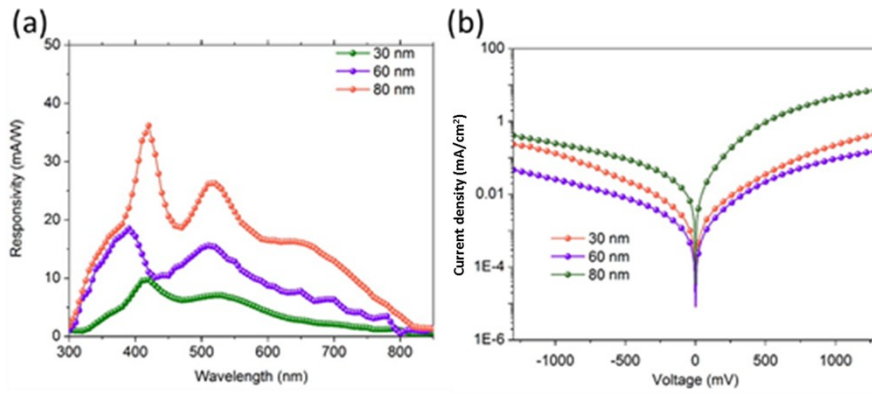

**Figure S4.** (a) Responsivity and (b) IV curves of the devices under the dark condition based on different thickness of P-TPD layer.

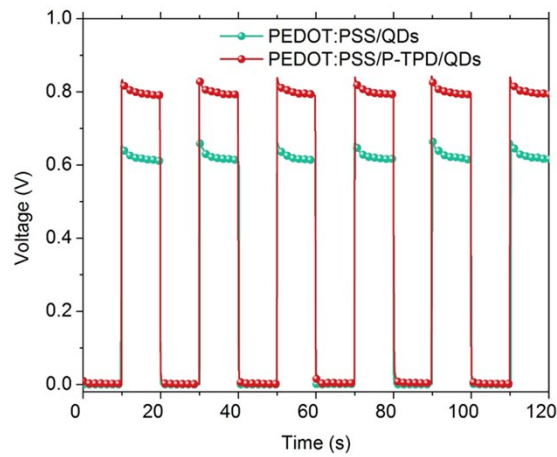

**Figure S5.** The temporal response and recovery of voltage of the devices upon  $100 \text{ mW/cm}^2$  sun light intensity.

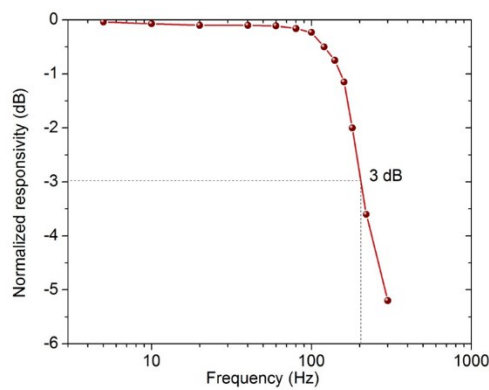

**Figure S6.** The 3 dB bandwidth of the double HTL-based device.

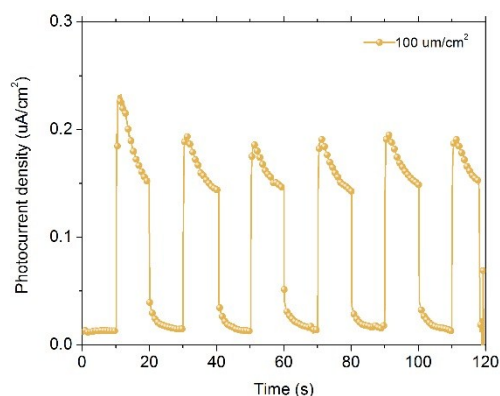

**Figure S7.** Weak light conditions in conventional current detection mode for the PEDOT:PSS device.

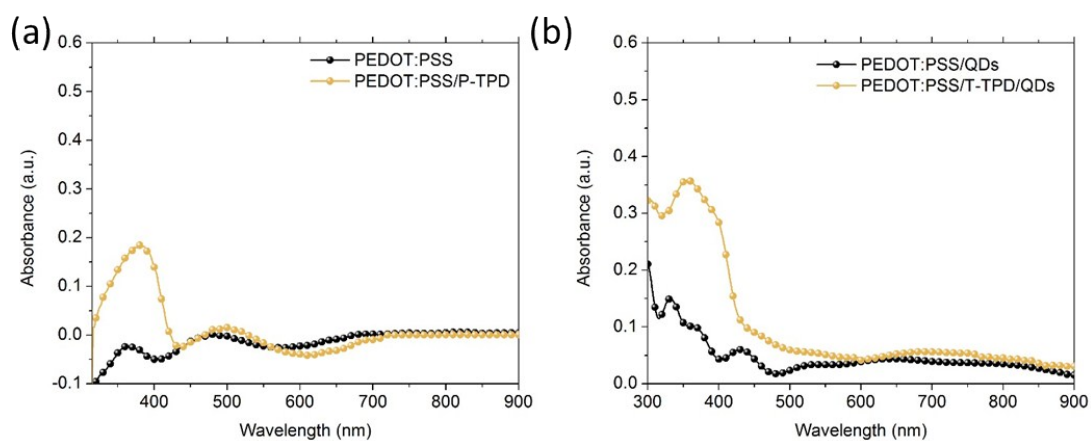

**Figure S8.** The absorption of the PEDOT:PSS films, PEDOT:PSS/P-TPD films (a), PEDOT:PSS/QDs films and PEDOT:PSS/P-TPD/QDs films (b).

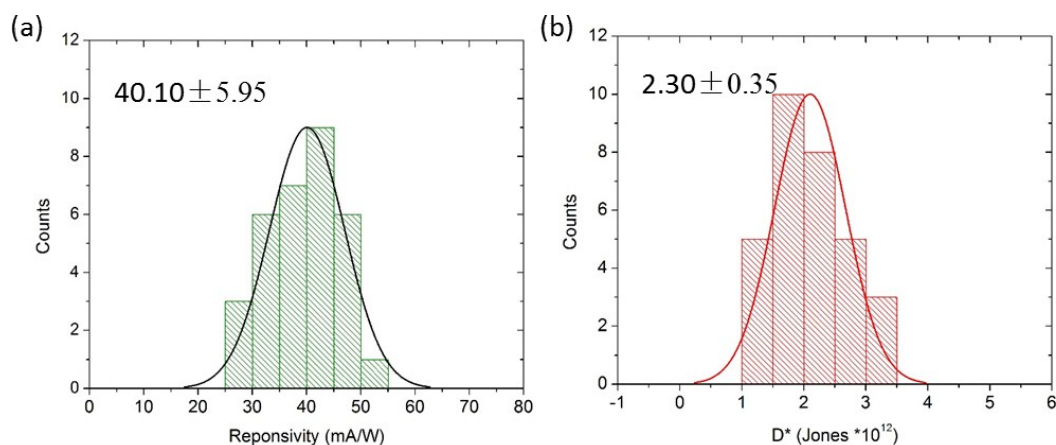

**Figure S9.** Statistical histogram of the responsivity (a) and detectivity (b) of 31 individual P-TPD based photodetectors.

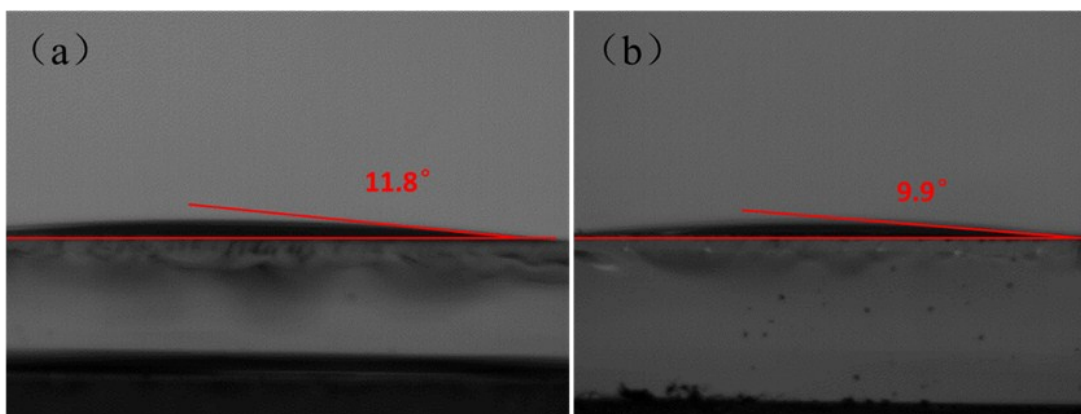

**Figure S10.** Contact angles of octane droplets on PEDOT:PSS films (a) and PEDOT:PSS/P-TPD films (b).

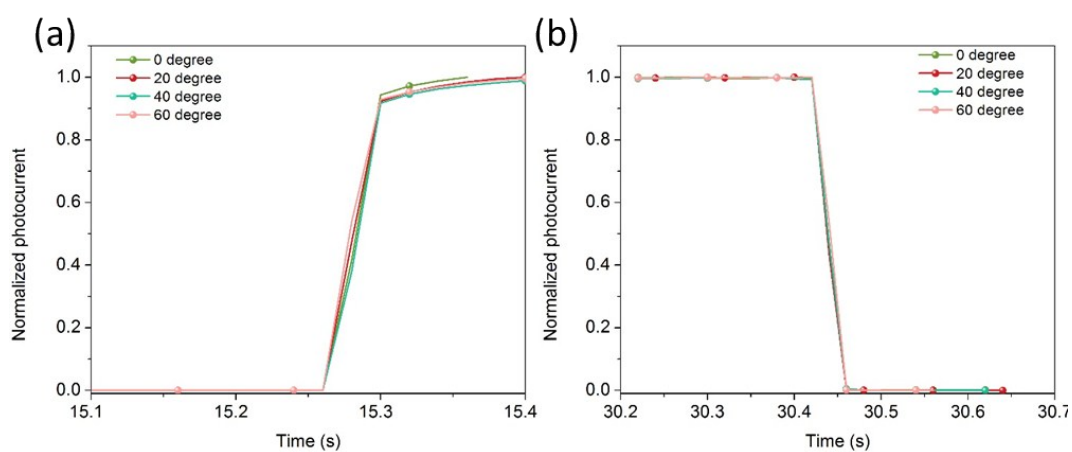

**Figure S11.** Photocurrent rise (a) and decay (b) of the device at various angles of curvature measured at a light intensity of 100 mW/cm<sup>2</sup>.

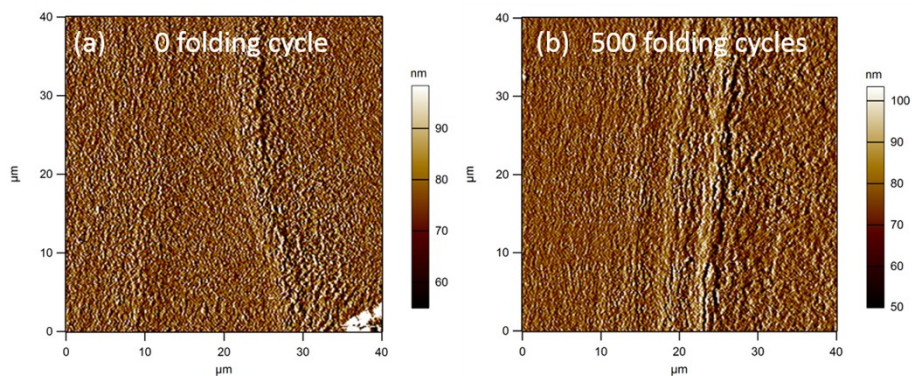

**Figure S12.** Atomic force microscopy (AFM) of PEDOT:PSS/P-TPD/QDs/ZnO films after being subjected to (a) 0 folding cycle and (b) 500 folding cycles.

**Table S1.** Figures of merit and progress of flexible quantum dots photodetectors.

| Year | Spectral region | D* (Jones *10 <sup>12</sup> )              | Rise/decay Time (s) | Quantum efficiency(%)              | Materials                               | Refs      |
|------|-----------------|--------------------------------------------|---------------------|------------------------------------|-----------------------------------------|-----------|
| 2013 | Vis             | --                                         | 0.0007/0.0013       | 20 (1Wcm <sup>-2</sup> , 665nm)    | CdSe nanobelt /graphene QDs             | 1         |
| 2014 | UV              | --                                         | 0.1/0.2             | --                                 | ZnO/Au                                  | 2         |
| 2016 | UV-NIR          | (500nm) 3.0                                | 0.25/5.3            | --                                 | Perovskite/graphene QDs                 | 3         |
| 2017 | Vis-NIR         | (400nm)4.3<br>(980nm)0.76                  | 0.052/0.063         | 36(0.4 Wcm <sup>-2</sup> , 560nm)  | Perovskite/nanoparticles                | 4         |
| 2017 | Vis-NIR         | (580nm) 1.44                               | --                  | --                                 | PbS QDs                                 | 5         |
| 2017 | UV-NIR          | (700nm) 0.38<br>(350nm) 2.5                | 7/4                 | --                                 | TiO <sub>2</sub> /perovskite QDs        | 6         |
| 2018 | UV-NIR          | (450nm)4.23<br>(830nm)2.6                  | 0.098/0.051         | 163(450nm)/54(830nm)               | Au/perovskite                           | 7         |
| 2018 | UV-NIR          | (375nm) 3.98<br>(532nm) 2.39<br>(808) 0.37 | 1.01/1.35           | --                                 | PbS QDs/ZnO                             | 8         |
| 2018 | UV              | --                                         | 0.25                | --                                 | ZnO QDs                                 | 9         |
| 2018 | UV-NIR          | (350 nm)2.1<br>(420nm) 2.6<br>(800nm) 0.6  | 0.04/0.04           | 13(350nm)<br>14(420nm)<br>3(800nm) | CdSe <sub>x</sub> Te <sub>1-x</sub> QDs | This work |

**Table S2.** Parameters of the flexible P-TPD-based double device and the rigid glass-based double device.

| Samples         | $I_{\text{light}}(\text{mA})$ | $I_{\text{dark}}(\text{mA})$ | $t_r/t_d$ (ms) | R(mA/W) | $D^*(\text{Jones})$  |
|-----------------|-------------------------------|------------------------------|----------------|---------|----------------------|
| Flexible device | 0.10                          | $1.03 \times 10^{-7}$        | 40             | 45      | $2.6 \times 10^{12}$ |
| Rigid device    | 0.12                          | $0.91 \times 10^{-7}$        | 40             | 47      | $2.9 \times 10^{12}$ |

**Table S3.** Weak-light response and progress of self-powered photodetectors.

| Year | Light wavelength (nm) | Light intensity ( $\mu\text{m}/\text{cm}^2$ ) | $I_{\text{light}}(\text{nA}/\text{cm}^2)$ | Materials                          | Refs      |
|------|-----------------------|-----------------------------------------------|-------------------------------------------|------------------------------------|-----------|
| 2005 | 514                   | 10                                            | 18                                        | CdSe QDs                           | 10        |
| 2017 | 850                   | 10                                            | 10                                        | Perovskite/Polymer                 | 11        |
| 2018 | white                 | 10                                            | 300                                       | Perovskite                         | 12        |
| 2018 | white                 | 10                                            | 5                                         | Organic/PbS QDs                    | 13        |
| 2018 | white                 | 20                                            | 600                                       | $\text{CdSe}_x\text{Te}_{1-x}$ QDs | This work |

## References

- 1 Z. Gao, W. Jin, Y. Zhou, Y. Dai, B. Yu, C. Liu, W. Xu, Y. Li, H. Peng, Z. Liu, L. Dai, *Nanoscale*, 2013, **5**, 5576-5581.
- 2 S. Lu, J. Qi, S. Liu, Z. Zhang, Z. Wang, P. Lin, Q. Liao, Q. Liang, Y. Zhang, *ACS Appl. Mater. Interface*, 2014, **6**, 14116-14122.
- 3 V. Q. Dang, G. -S. Han, T. Q. Trung, L. T. Duy, Y. -U. Jin, B. U. Hwang, H. -S. Jung, N. -E. Lee, *Carbon*, 2016, **105**, 353-361.
- 4 J. Li, Y. Shen, Y. Liu, F. Shi, X. Ren, T. Niu, K. Zhao, S. F. Liu, *ACS Appl. Mater. Interface*, 2017, **9**, 19176-19183.
- 5 Z. Ren, J. Sun, H. Li, P. Mao, Y. Wei, X. Zhong, J. Hu, S. Yang, J. Wang, *Adv. Mater.* 2017, **29**, 1702055.
- 6 Z. Zheng, F. Zhuge, Y. Wang, J. Zhang, L. Gan, X. Zhou, H. Li, T. Zhai, *Adv. Funct. Mater.* 2017, **27**, 1703115.
- 7 X. Luo, F. Zhao, Y. Liang, L. Du, W. Lv, K. Xu, Y. Wang, Y. Peng, *Adv. Opt. Mater.* 2018, **6**, 1800996.
- 8 M. Peng, Y. Wang, Q. Shen, X. Xie, H. Zheng, W. Ma, Z. Wen, X. Sun, *Sci. China Mater.* 2019, **62**, 225-235.
- 9 S. Mitra, A. Aravindh, G. Das, Y. Pak, I. Ajia, K. Loganathan, E. Di Fabrizio, I. S. Roqan, *Nano Energy*, 2018, **48**, 551-559.
- 10 D. C. Oertel, M. G. Bawendi, A. C. Arango, V. Bulović, *Appl. Phys. Lett.* 2005, **87**, 213505.
- 11 Y. Wang, D. Yang, X. Zhou, D. Ma, A. Vadim, T. Ahamad, S. M. Alshehri, *Adv. Opt. Mater.* 2017, **5**, 1700213.
- 12 C. Bao, J. Yang, S. Bai, W. Xu, Z. Yan, Q. Xu, J. Liu, W. Zhang, F. Gao, *Adv. Mater.* 2018, **30**, e1803422.
- 13 Y. Wei, Z. Ren, A. Zhang, P. Mao, H. Li, X. Zhong, W. Li, S. Yang, J. Wang, *Adv. Funct. Mater.* 2018, **28**, 1706690.
